# Supplementary material for: Association of Metabolically Healthy Overweight Phenotype With Abnormalities of Glucose Levels and Blood Pressure Among Chinese Adults
Source: PubMed Central journal article supplement (PMC6822082; doi:10.1001/jamanetworkopen.2019.14025), 2019-10-25
Supplement: jamanetwopen-2-e1914025-s001.pdf [file jamanetwopen-2-e1914025-s001.pdf]

## Supplementary Online Content

Xu R, Gao X, Wan Y, Fan Z. Association of metabolically healthy overweight phenotype with abnormalities of glucose and blood pressure among Chinese adults. *JAMA Netw Open*. 2019;2(10):e1914025. doi:10.1001/jamanetworkopen.2019.14025

**eTable 1.** Baseline Characteristics of Included and Excluded Study Participants

**eTable 2.** Adjusted Hazard Ratios and 95% Confidence Intervals for Risks of Incident Abnormalities of Glucose and Blood Pressure Across Different Body Weight Status During Four-Year Follow-up Among 3204 Chinese Adults: Subgroup Analysis

This supplementary material has been provided by the authors to give readers additional information about their work.

**eTable 1.** Baseline Characteristics of Included and Excluded Study Participants

| Variables                       | Participants in the study | Participants out of the study | P value |
|---------------------------------|---------------------------|-------------------------------|---------|
| Sample                          | 3,204                     | 51,951                        | --      |
| Age, y                          | 42.4±11.6                 | 50.7±14.8                     | <0.001  |
| Sex, men/women, n (%)           | 1264 (39.4)/1940 (54.8)   | 31,067 (59.8)/20,884 (40.2)   | <0.001  |
| hs-CRP, mg/L                    | 1.1±3.6                   | 1.6±4.1                       | <0.001  |
| BMI, kg/m <sup>2</sup>          | 22.3±2.8                  | 24.3±3.3                      | <0.001  |
| SBP, mmHg                       | 113.3±13.0                | 128.3±19.1                    | <0.001  |
| DBP, mmHg                       | 68.9±8.6                  | 77.1±12.4                     | <0.001  |
| FBG, mmol/L                     | 5.0±0.7                   | 5.4±1.3                       | <0.001  |
| HbA1c, %                        | 5.2±0.4                   | 5.6±0.8                       | <0.001  |
| HOMA-IR                         | 1.2±0.8                   | 1.8±1.6                       | <0.001  |
| TC, mmol/L                      | 4.7±0.7                   | 5.1±1.0                       | <0.001  |
| TG, mmol/L                      | 1.0±0.7                   | 1.7±1.4                       | <0.001  |
| HDL-C, mmol/L                   | 1.5±0.3                   | 1.4±0.4                       | <0.001  |
| LDL-C, mmol/L                   | 2.6±0.6                   | 3.0±0.8                       | <0.001  |
| Uric acid, μmol/L               | 295.5±73.1                | 338.7±86.1                    | <0.001  |
| eGFR, ml/min/1.73m <sup>2</sup> | 125.7±82.7                | 109.7±24.7                    | <0.001  |

**Abbreviation:** **hs-CRP**, high sensitivity C-reactive protein; **HbA1c**, glycated hemoglobin A1c; **BMI**, body mass index; **SBP**, systolic blood pressure; **DBP**, diastolic blood pressure; **FBG**, fasting blood glucose; **TC**, total cholesterol; **TG**, triglyceride; **HDL-C**, high density lipoprotein cholesterol; **LDL-C**, low density lipoprotein cholesterol; **eGFR**, estimating glomerular filtration rate.

**eTable 2.** Adjusted Hazard Ratios and 95% Confidence Intervals for Risks of Incident Abnormalities of Glucose and Blood Pressure Across Different Body Weight Status During Four-Year Follow-up Among 3204 Chinese Adults: Subgroup Analysis

| Outcome             | Group variables | Model                    | MHN                      | MHO               |                    |
|---------------------|-----------------|--------------------------|--------------------------|-------------------|--------------------|
| Glucose abnormality | Men             | Number of participants   | 1,133 (89.6%)            | 131 (10.4%)       |                    |
|                     |                 | Number of incident cases | 77 (81.0%)               | 18 (19.0%)        |                    |
|                     |                 | Multiple-adjusted model  | <b>Ref (1.0)</b>         | 2.06 (1.21, 3.52) |                    |
|                     | Women           | Number of participants   | 1,848 (95.3%)            | 92 (4.7%)         |                    |
|                     |                 | Number of incident cases | 42 (82.4%)               | 9 (17.6%)         |                    |
|                     |                 | Multiple-adjusted model  | <b>Ref (1.0)</b>         | 3.63 (1.72, 7.65) |                    |
|                     | <65 years       | Number of participants   | 2,855 (92.9%)            | 217 (7.1%)        |                    |
|                     |                 |                          | Number of incident cases | 106 (80.9%)       | 25 (19.1%)         |
|                     |                 |                          | Multiple-adjusted model  | <b>Ref (1.0)</b>  | 2.55 (1.62, 7.65)  |
|                     |                 | ≥65 years                | Number of participants   | 126 (95.5%)       | 6 (4.5%)           |
|                     |                 |                          | Number of incident cases | 13 (86.7%)        | 2 (13.3%)          |
|                     |                 |                          | Multiple-adjusted model  | <b>Ref (1.0)</b>  | 5.55 (0.7, 42.88)  |
| High blood pressure | Men             | Number of participants   | 1,133 (89.6%)            | 131 (10.4%)       |                    |
|                     |                 | Number of incident cases | 114 (83.8%)              | 22 (16.2%)        |                    |
|                     |                 | Multiple-adjusted model  | <b>Ref (1.0)</b>         | 1.39 (0.86, 2.26) |                    |
|                     | Women           | Number of participants   | 1,848 (95.3%)            | 92 (4.7%)         |                    |
|                     |                 | Number of incident cases | 71 (84.5%)               | 13 (15.5%)        |                    |
|                     |                 | Multiple-adjusted model  | <b>Ref (1.0)</b>         | 2.66 (1.43, 4.95) |                    |
|                     | <65 years       | Number of participants   | 2,855 (92.9%)            | 217 (7.1%)        |                    |
|                     |                 |                          | Number of incident cases | 163 (82.7%)       | 34 (17.3%)         |
|                     |                 |                          | Multiple-adjusted model  | <b>Ref (1.0)</b>  | 2.05 (1.39, 3.01)  |
|                     |                 | ≥65 years                | Number of participants   | 126 (95.5%)       | 6 (4.5%)           |
|                     |                 |                          | Number of incident cases | 22 (95.7%)        | 1 (4.3%)           |
|                     |                 |                          | Multiple-adjusted model  | <b>Ref (1.0)</b>  | 1.75 (0.18, 17.27) |

**Note:**

1. “MHO was defined if participants were confirmed with overweight (BMI≥24.0 kg/m<sup>2</sup>) both in 2013 (baseline) and in 2014, and the

remained participants were defined as MHN.

2. Multiple-adjusted model: adjusting for age (y), systolic blood pressure (mmHg), diastolic blood pressure (mmHg), fasting blood glucose (mmol/L), glycated hemoglobin A1c (%), total cholesterol (mmol/L), triglyceride (mmol/L), low-density-lipoprotein cholesterol (mmol/L), high-density-lipoprotein cholesterol (mmol/L), alanine transferase (IU/l), aspartate transferase (IU/l), uric acid ( $\mu\text{mol/L}$ ), and eGFR( $\text{ml/min}/1.73\text{m}^2$ ). However, group variables were not included in the model.
